# Supplementary material
Source: PubMed Central journal article supplement (PMC6110144)
Supplement: develop-145-164822-s1.pdf [file develop-145-164822-s1.pdf]

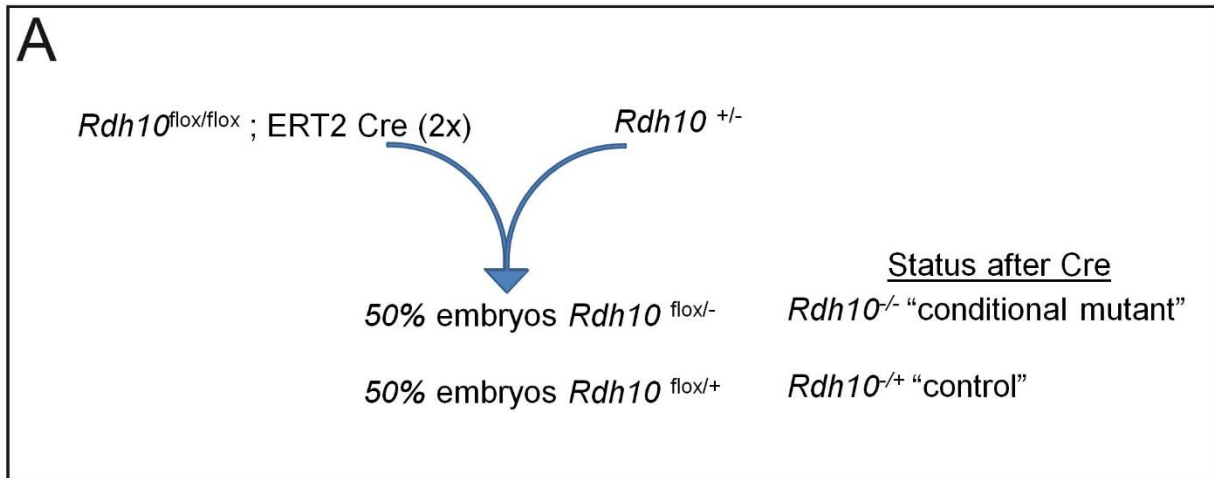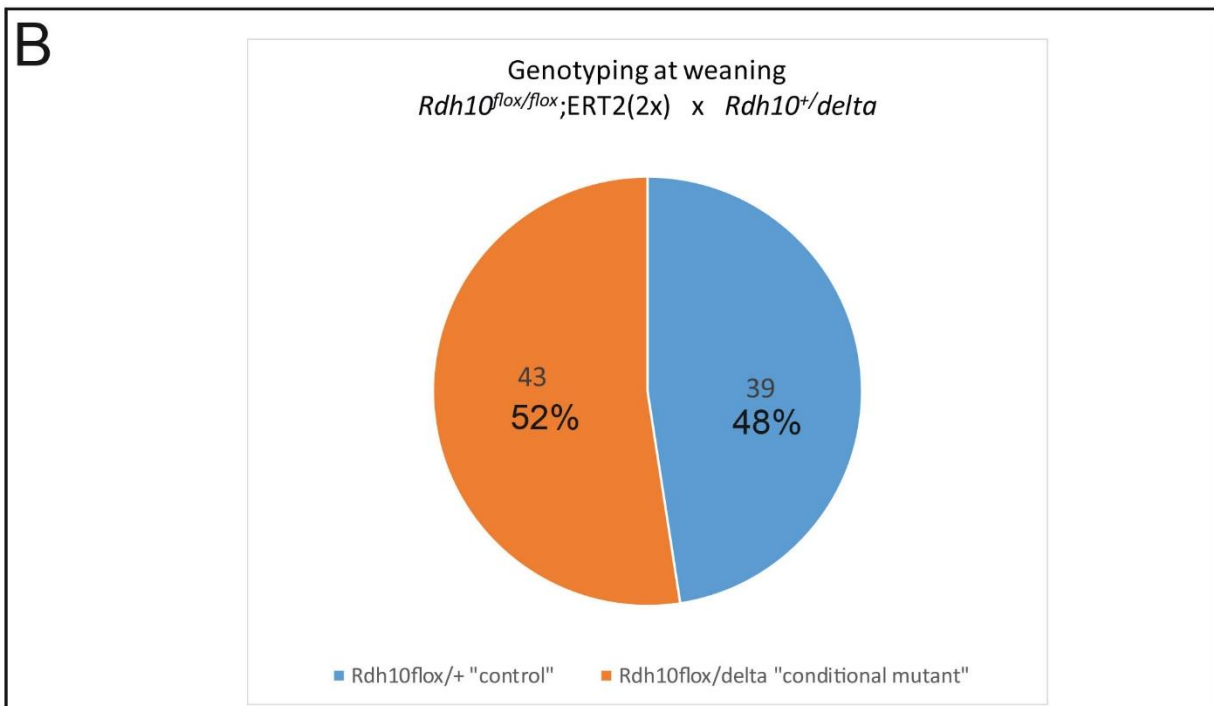

**Supplemental Figure 1: Crossing *Rdh10<sup>flox/flox</sup>; ERT2\*2 X *Rdh10<sup>+/-</sup>/delta* yields conditional mutant embryos and heterozygous controls in expected 50:50 ratio.*** (A) Strategy for genetic cross to produce conditional mutant embryos and heterozygous control littermates. When *Rdh10<sup>flox/flox</sup>; ERT2\*2* mice are crossed with *Rdh10<sup>+/-</sup>/delta* 50% the resulting pups are *Rdh10<sup>flox/+</sup>* and 50% are *Rdh10<sup>flox/delta</sup>*. All embryos carry a single copy of ERT2-Cre recombinase. (B) A survey of 10 litters from this cross which were genotyped at weaning. Out of a total of 82 pups, 39 (48%) were *Rdh10<sup>+/-</sup>/flox*, and 43 (52%) were *Rdh10<sup>delta/flox</sup>*.

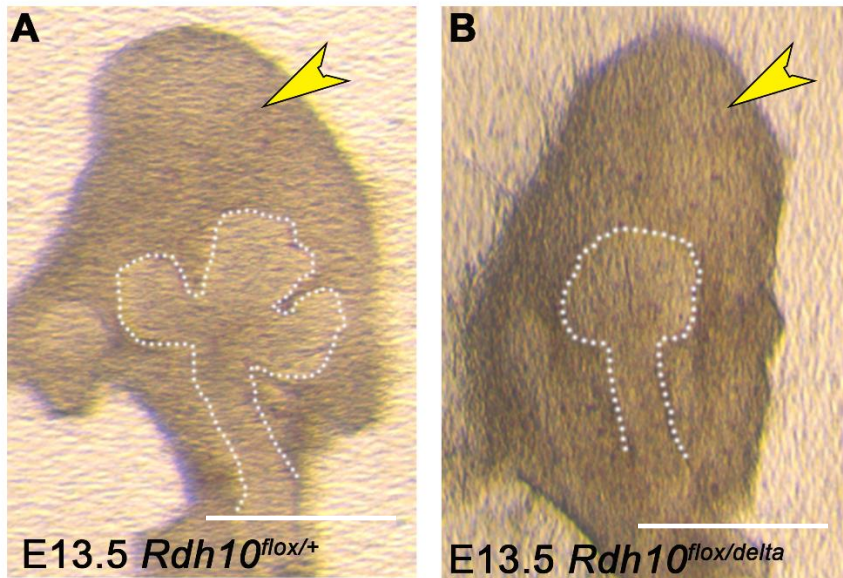

**Supplemental Figure 2: SMG mesenchyme condenses in *Rdh10* conditional mutants.** Bright field images of representative E13.5 SMG from control (A) (n=16), and *Rdh10* conditional mutant embryos (B) (n=21). Dotted line outlines epithelium. Yellow arrow indicates condensed mesenchyme. scale bar = 100 $\mu$ m.

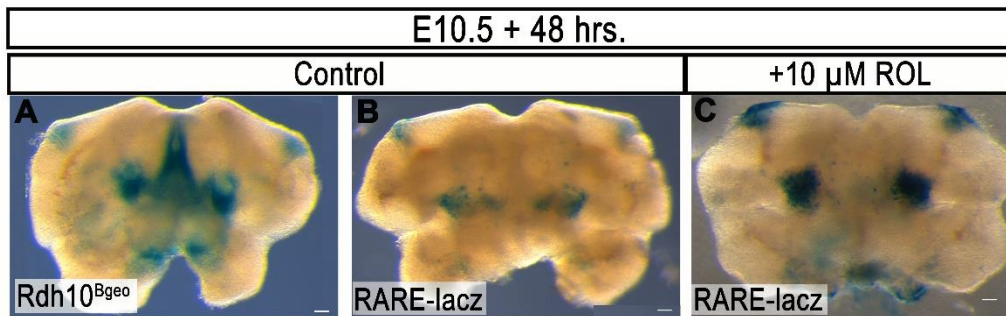

**Supplemental Figure 3: *Rdh10* expression and signaling maintained in *ex vivo* mandible culture.** (A) Whole mandible from *Rdh10*<sup>Bgeo/+</sup> mutant embryo. Mandible was dissected out at E10.5, cultured for 48 hours, and stained with X-gal. (B) Whole mandible from *RARE-lacZ* mutant embryo. Mandible was dissected out at E10.5, cultured for 48 hours, and stained with X-gal. (C) Mandible culture from *RARE-lacZ* mutant embryo, treated with 10 $\mu$ M retinol, whole mount stained with X-gal. scale bar = 100 $\mu$ m.

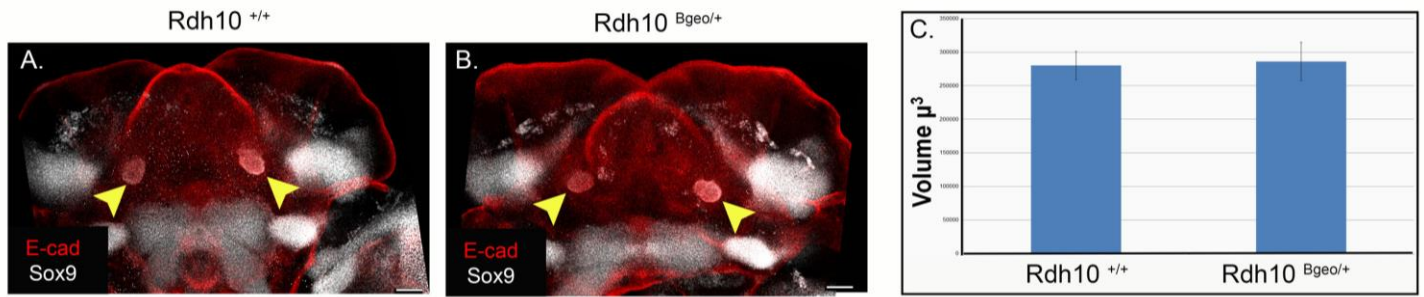

**Supplemental Figure 4: Heterozygosity for *Rdh10* does not impair SMG initiation.** E10.5 mandibles from *Rdh10*<sup>+/+</sup> and *Rdh10*<sup>Bgeo/+</sup> were cultured for 48 hours, and then whole mount stained for E-cadherin and SOX9. Images shown are merged max projection of confocal stacks (A, B). Volume was calculated for each gland in each condition. Bar graph shows average and standard error bars for each group (n = 6 glands each genotype). scale bar = 100 $\mu$ m.

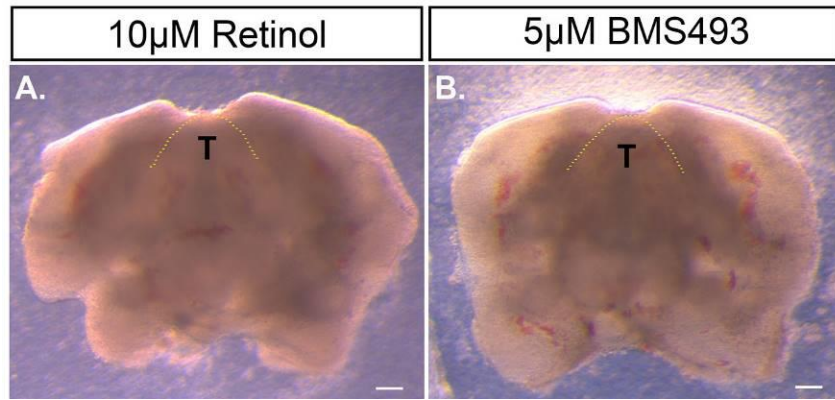

**Supplemental Figure 5: Overall development of cultured mandible explants is normal when treated with retinol or BMS493.** Bright field images of cultured mandibles treated with either 10 $\mu$ M retinol or 5 $\mu$ M BMS493 are shown (*A*, *B*). t, tongue.

**Table 1. Mouse strains used in this study**

| Short name                       | Official name                                   | Background in this study | Ref.                   |
|----------------------------------|-------------------------------------------------|--------------------------|------------------------|
| <i>Rdh10<sup>Bgeo/+</sup></i>    |                                                 | C57BL/6                  | (Sandell et al., 2012) |
| <i>Rdh10<sup>flox/flox</sup></i> |                                                 | Mixed (primarily FVB/NJ) | (Sandell et al., 2012) |
| <i>Rdh10<sup>delta/+</sup></i>   |                                                 | Mixed (primarily FVB/NJ) | (Sandell et al., 2012) |
| Cre-ERT2                         | <i>Gt(ROSA)26Sor<sup>tm1(cre/ERT2)Tyj</sup></i> | Mixed                    | (Ventura et al., 2007) |
| RARE-lacZ                        | Tg(RARE-Hspa1b/lacZ)12Jrt                       | Mixed                    | (Rossant et al., 1991) |
|                                  |                                                 |                          |                        |

**Table 2. Primers used for qPCR quantification of gene expression**

|       |                                                                  |
|-------|------------------------------------------------------------------|
| Fgf10 | F: 5' TTTGGTGTCTTCGTTCCCTGT 3'<br>R: 5' TAGCTCCGCACATGCCTTC 3'   |
| Lacz  | F: 5' TTATCAGCCGGAAAACCTACC 3'<br>R: 5' CTCGCCACTTCAACATCAAC 3'  |
| Gapdh | F: 5' ACAGTCCATGCCATCACTGCC 3'<br>R: 5' GCCTGCTTCACCACCTTCTTG 3' |
| Actb  | F: 5' GGCTGTATTCCCCTCCATCG 3'<br>R: 5' CCAGTTGGTAACAATGCCATGT 3' |
